# Supplementary material
Source: ML conference proceedings conference paper supplement (https://openreview.net/forum?id=sBT5nxwt18Q)
Supplement: supplementary_material [file attachment]

# Correct No Box Example

Evaluating Explanations of a Computer Program

Question 8 - AA

Task 1:

The program was presented with this picture:

Original



The program labelled this picture as: **Library**

Task 2:

Explanation: The program labelled the object in the picture (Original) this way because of what it learned from this other picture (Explanation) that people labelled as: **Library**.

Original

Explanation



Task 3:

The program's labelling of the image in Task 1 is correct:

1

I disagree strongly

☐

2

I disagree somewhat

☐

3

I'm neutral about it

☐

4

I agree somewhat

☐

5

I agree strongly

☐

Task 4:

The explanation in Task 2 helps me understand the program's labelling of the object in the picture: -

1

I disagree strongly

☐

2

I disagree somewhat

☐

3

I'm neutral about it

☐

4

I agree somewhat

☐

5

I agree strongly

☐

Back

Next

41%
