# Supplementary material
Source: ML conference proceedings conference paper supplement (https://openreview.net/forum?id=sBT5nxwt18Q)
Supplement: supplementary_material [file attachment]

## Incorrect Box Example

### Evaluating Explanations of a Computer Program

Question 19 - AB

#### Task 1:

The program was presented with this picture:

Original

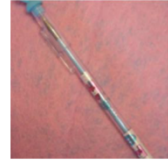

The program labelled this picture as: **Flute**

#### Task 2:

Explanation: The program labelled the object in the picture (Original) this way because of what it learned from this other picture (Explanation) that people labelled as: **Flute**.

Original

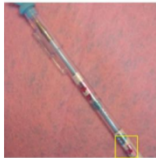

Explanation

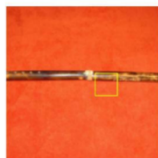

#### Task 3:

The program's labelling of the image in Task 1 is correct.

1  
I disagree strongly  
☐

2  
I disagree somewhat  
☐

3  
I'm neutral about it  
☐

4  
I agree somewhat  
☐

5  
I agree strongly  
☐

#### Task 4:

The explanation in Task 2 helps me understand the program's labelling of the object in the picture: -

1  
I disagree strongly  
☐

2  
I disagree somewhat  
☐

3  
I'm neutral about it  
☐

4  
I agree somewhat  
☐

5  
I agree strongly  
☐

[Back](#) [Next](#)

35%
